# Supplementary material for: Listeria monocytogenes in ready to eat meat products from Zambia: phenotypical and genomic characterization of isolates
Source: Frontiers journal article supplement (doi:10.3389/fmicb.2023.1228726), 2023-08-30
Supplement: Data_Sheet_1.zip [file Supplementary Table 1.XLSX]

## Sheet: Table_S1
Sample Identification	Product Type	Ready to eat Category	Date of Sampling	Food Businness Operator
1	meat	polony	2019-10-22	M10
2	meat	polony	2019-10-22	M10
3	meat	polony	2019-10-22	M10
4	meat	polony	2019-10-22	M10
5	meat	polony	2019-10-22	M10
6	meat	biltong	2019-10-22	M10
7	meat	biltong	2019-10-22	M10
8	meat	salami	2019-10-22	M10
9	meat	biltong	2019-10-22	M10
10	meat	polony	2019-10-22	M5
11	meat	ham	2019-10-22	M11
12	meat	ham	2019-10-22	M6
13	meat	polony	2019-10-22	M1
14	meat	polony	2019-10-22	M1
15	meat	ham	2019-10-22	M1
16	meat	ham	2019-10-22	M6
17	meat	polony	2019-10-22	M2
18	meat	polony	2019-10-22	M1
19	meat	polony	2019-10-22	M6
20	meat	sausage	2019-10-22	M6
21	meat	sausage	2019-10-22	M1
22	meat	sausage	2019-10-22	M2
23	meat	ham	2019-10-22	M1
24	meat	salami	2019-10-22	M8
25	meat	salami	2019-10-22	M8
26	meat	ham	2019-10-22	M11
27	meat	ham	2019-10-22	M1
28	meat	ham	2019-10-22	M1
29	meat	polony	2019-10-22	M11
30	meat	ham	2019-10-22	M1
31	meat	salami	2019-10-22	M1
32	meat	polony	2019-10-22	M11
33	meat	polony	2019-10-22	M11
34	meat	polony	2019-10-22	M6
35	meat	ham	2019-10-22	M6
36	meat	polony	2019-10-22	M2
37	meat	polony	2019-10-22	M8
38	meat	sausage	2019-10-22	M8
39	meat	sausage	2019-10-22	M2
40	meat	sausage	2019-10-22	M6
41	meat	polony	2019-10-22	M6
42	meat	polony	2019-10-22	M11
43	meat	sausage	2019-10-22	M12
44	meat	salami	2019-10-22	M12
45	meat	polony	2019-10-22	M12
46	meat	ham	2019-10-22	M14
47	meat	polony	2019-10-22	M9
48	meat	sausage	2019-10-22	M9
49	meat	ham	2019-10-22	M14
50	meat	ham	2019-10-22	M14
51	meat	biltong	2019-10-22	M14
52	meat	polony	2019-10-22	M12
53	meat	polony	2019-10-22	M11
54	meat	polony	2019-10-22	M15
55	meat	polony	2020-01-09	M12
56	meat	polony	2020-01-09	M12
57	meat	polony	2020-01-09	M12
58	meat	polony	2020-01-09	M12
59	meat	polony	2020-01-09	M12
60	meat	ham	2020-01-09	M12
61	meat	ham	2020-01-09	M12
62	meat	ham	2020-01-09	M12
63	meat	ham	2020-01-09	M9
64	meat	ham	2020-01-09	M12
65	meat	polony	2020-01-09	M12
66	meat	polony	2020-01-09	M3
67	meat	polony	2020-01-09	M3
68	meat	polony	2020-01-09	M3
69	meat	polony	2020-01-09	M3
70	meat	polony	2020-01-09	M3
71	meat	sausage	2020-01-09	M3
72	meat	biltong	2020-01-09	M3
73	meat	polony	2020-01-09	M12
74	meat	polony	2020-01-09	M12
75	meat	polony	2020-01-09	M11
76	meat	polony	2020-01-09	M11
77	meat	salami	2020-01-09	M12
78	meat	sausage	2020-01-09	M12
79	meat	sausage	2020-01-09	M3
80	meat	sausage	2020-01-09	M4
81	meat	sausage	2020-01-09	M4
82	meat	sausage	2020-01-09	M4
83	meat	polony	2020-01-09	M3
84	meat	polony	2020-01-09	M2
85	meat	polony	2020-01-09	M2
86	meat	sausage	2020-01-09	M2
87	meat	polony	2020-01-09	M2
88	meat	polony	2020-01-09	M2
89	meat	polony	2020-01-09	M2
90	meat	ham	2020-01-09	M11
91	meat	polony	2020-01-09	M11
92	meat	polony	2020-01-09	M11
93	meat	ham	2020-01-09	M11
94	meat	polony	2020-01-09	M1
95	meat	polony	2020-01-09	M1
96	meat	ham	2020-01-09	M1
97	meat	polony	2020-01-09	M1
98	meat	ham	2020-01-09	M1
99	meat	ham	2020-01-09	M1
100	meat	sausage	2020-01-09	M11
101	meat	ham	2020-01-09	M11
102	meat	polony	2020-01-09	M1
103	meat	polony	2020-01-09	M1
104	meat	polony	2020-01-09	M3
105	meat	polony	2020-01-09	M3
106	meat	polony	2020-01-09	M5
107	meat	ham	2020-01-09	M5
108	meat	ham	2020-01-09	M1
109	meat	polony	2020-01-09	M1
110	meat	polony	2020-01-09	M1
111	meat	ham	2020-01-09	M1
112	meat	salami	2020-01-09	M5
113	meat	ham	2020-01-09	M5
114	meat	ham	2020-01-09	M5
115	meat	polony	2020-02-12	M1
116	meat	polony	2020-02-12	M11
117	meat	ham	2020-02-12	M1
118	meat	polony	2020-02-12	M1
119	meat	polony	2020-02-12	M1
120	meat	polony	2020-02-12	M11
121	meat	biltong	2020-02-12	M5
122	meat	biltong	2020-02-12	M5
123	meat	ham	2020-02-12	M5
124	meat	polony	2020-02-12	M5
125	meat	salami	2020-02-12	M5
126	meat	biltong	2020-02-12	M5
127	meat	biltong	2020-02-12	M5
128	meat	polony	2020-02-12	M11
129	meat	polony	2020-02-12	M11
130	meat	salami	2020-02-12	M12
131	meat	polony	2020-02-12	M16
132	meat	polony	2020-02-12	M11
133	meat	ham	2020-02-12	M11
134	meat	polony	2020-02-12	M12
135	meat	biltong	2020-02-12	M7
136	meat	sausage	2020-02-12	M12
137	meat	biltong	2020-02-12	M14
138	meat	ham	2020-02-12	M5
139	meat	ham	2020-02-12	M5
140	meat	ham	2020-02-12	M5
141	meat	biltong	2020-02-12	M5
142	meat	biltong	2020-02-12	M5
143	meat	polony	2020-02-12	M1
144	meat	polony	2020-02-12	M1
145	meat	sausage	2020-02-12	M6
146	meat	polony	2020-02-12	M8
147	meat	polony	2020-02-12	M6
148	meat	polony	2020-02-12	M11
149	meat	polony	2020-02-12	M2
150	meat	sausage	2020-02-12	M8
151	meat	biltong	2020-02-12	M5
152	meat	polony	2020-02-12	M1
153	meat	ham	2020-02-12	M13
154	meat	polony	2020-02-12	M8
155	meat	ham	2020-02-12	M13
156	meat	polony	2020-02-12	M13
157	meat	ham	2020-02-12	M11
158	meat	polony	2020-02-12	M11
159	meat	ham	2020-02-12	M14
160	meat	ham	2020-02-12	M12
161	meat	polony	2020-02-12	M12
162	meat	biltong	2020-02-12	M7
163	meat	ham	2020-02-12	M12
164	meat	ham	2020-02-12	M9
165	meat	sausage	2020-02-12	M9
166	meat	ham	2020-02-12	M12
167	meat	polony	2020-02-12	M11
168	meat	sausage	2020-02-12	M12
169	meat	polony	2020-02-12	M8
170	meat	salami	2020-02-12	M13
171	meat	polony	2020-02-12	M1
172	meat	polony	2020-02-12	M1
173	meat	salami	2020-02-12	M8
174	meat	polony	2020-02-12	M2
175	dairy	milk drink	2019-10-22	D1
176	dairy	milk drink	2019-10-22	D1
177	dairy	milk drink	2019-10-22	D1
178	dairy	milk drink	2019-10-22	D2
179	dairy	milk drink	2019-10-22	D3
180	dairy	milk drink	2019-10-22	D4
181	dairy	milk drink	2019-10-22	D2
182	dairy	milk drink	2019-10-22	D2
183	dairy	milk drink	2019-10-22	D2
184	dairy	milk drink	2019-10-22	D2
185	dairy	milk drink	2019-10-22	D2
186	dairy	milk drink	2019-10-22	D2
187	dairy	milk drink	2019-10-22	D2
188	dairy	milk drink	2019-10-22	D1
189	dairy	milk drink	2019-10-22	D4
190	dairy	cheese	2019-10-22	D1
191	dairy	cheese	2019-10-22	D1
192	dairy	milk drink	2019-10-22	D2
193	dairy	milk drink	2019-10-22	D1
194	dairy	ice cream	2019-10-22	D5
195	dairy	milk drink	2019-10-22	D1
196	dairy	milk drink	2019-10-22	D2
197	dairy	milk drink	2019-10-22	D2
198	dairy	ice cream	2019-10-22	D6
199	dairy	milk drink	2019-10-22	D1
200	dairy	milk drink	2019-10-22	D1
201	dairy	milk drink	2019-10-22	D1
202	dairy	milk drink	2019-10-22	D7
203	dairy	milk drink	2019-10-22	D2
204	dairy	butter	2019-10-22	D1
205	dairy	milk drink	2019-10-22	D8
206	dairy	milk drink	2019-10-22	D8
207	dairy	milk drink	2019-10-22	D8
208	dairy	cheese	2019-10-22	D1
209	dairy	milk drink	2019-10-22	D4
210	dairy	milk drink	2019-10-22	D1
211	dairy	ice cream	2019-10-22	D5
212	dairy	milk drink	2019-10-22	D2
213	dairy	cheese	2019-10-22	D9
214	dairy	milk drink	2019-10-22	D10
215	dairy	cheese	2019-10-22	D1
216	dairy	milk drink	2019-10-22	D4
217	dairy	butter	2019-10-22	D1
218	dairy	milk drink	2019-10-22	D11
219	dairy	milk drink	2019-10-22	D1
220	dairy	milk drink	2019-10-22	D1
221	dairy	cheese	2019-10-22	D12
222	dairy	milk drink	2019-10-22	D2
223	dairy	milk drink	2019-10-22	D2
224	dairy	milk drink	2019-10-22	D13
225	dairy	milk drink	2020-01-09	D23
226	dairy	milk drink	2020-01-09	D2
227	dairy	milk drink	2020-01-09	D23
228	dairy	milk drink	2020-01-09	D13
229	dairy	ice cream	2020-01-09	D5
230	dairy	ice cream	2020-01-09	D5
231	dairy	milk drink	2020-01-09	D2
232	dairy	milk drink	2020-01-09	D15
233	dairy	milk drink	2020-01-09	D2
234	dairy	cheese	2020-01-09	D15
235	dairy	ice cream	2020-01-09	D16
236	dairy	ice cream	2020-01-09	D18
237	dairy	milk drink	2020-01-09	D13
238	dairy	milk drink	2020-01-09	D13
239	dairy	milk drink	2020-01-09	D19
240	dairy	cheese	2020-01-09	D15
241	dairy	milk drink	2020-01-09	D13
242	dairy	milk drink	2020-01-09	D13
243	dairy	milk drink	2020-01-09	D2
244	dairy	milk drink	2020-01-09	D1
245	dairy	milk drink	2020-01-09	D1
246	dairy	milk drink	2020-01-09	D1
247	dairy	milk drink	2020-01-09	D1
248	dairy	milk drink	2020-01-09	D7
249	dairy	milk drink	2020-01-09	D1
250	dairy	cheese	2020-01-09	D9
251	dairy	cheese	2020-01-09	D9
252	dairy	milk drink	2020-01-09	D1
253	dairy	milk drink	2020-01-09	D1
254	dairy	milk drink	2020-01-09	D5
255	dairy	milk drink	2020-01-09	D1
256	dairy	milk drink	2020-01-09	D2
257	dairy	ice cream	2020-01-09	D5
258	dairy	milk drink	2020-01-09	D14
259	dairy	milk drink	2020-01-09	D4
260	dairy	ice cream	2020-01-09	D16
261	dairy	cheese	2020-01-09	D9
262	dairy	milk drink	2020-01-09	D2
263	dairy	milk drink	2020-01-09	D2
264	dairy	cheese	2020-01-09	D1
265	dairy	milk drink	2020-02-12	D4
266	dairy	milk drink	2020-02-12	D1
267	dairy	milk drink	2020-02-12	D1
268	dairy	cheese	2020-02-12	D15
269	dairy	cheese	2020-02-12	D20
270	dairy	cheese	2020-02-12	D21
271	dairy	milk drink	2020-02-12	D1
272	dairy	cheese	2020-02-12	D15
273	dairy	milk drink	2020-02-12	D4
274	dairy	milk drink	2020-02-12	D2
275	dairy	ice cream	2020-02-12	D17
276	dairy	milk drink	2020-02-12	D2
277	dairy	ice cream	2020-02-12	D5
278	dairy	cheese	2020-02-12	D1
279	dairy	milk drink	2020-02-12	D2
280	dairy	cheese	2020-02-12	D20
281	dairy	ice cream	2020-02-12	D22
282	dairy	milk drink	2020-02-12	D2
283	dairy	milk drink	2020-02-12	D2
284	dairy	milk drink	2020-02-12	D2
285	dairy	ice cream	2020-02-12	D17
286	dairy	ice cream	2020-02-12	D5
287	dairy	milk drink	2020-02-12	D2
288	dairy	milk drink	2020-02-12	D2
289	dairy	milk drink	2020-02-12	D1
290	dairy	milk drink	2020-02-12	D1
291	dairy	milk drink	2020-02-12	D5
292	dairy	ice cream	2020-02-12	D5
293	dairy	ice cream	2020-02-12	D18
294	dairy	milk drink	2020-02-12	D13
295	dairy	milk drink	2020-02-12	D13
296	dairy	milk drink	2020-02-12	D13
297	dairy	milk drink	2020-02-12	D2
298	dairy	milk drink	2020-02-12	D1
299	dairy	milk drink	2020-02-12	D13
300	dairy	milk drink	2020-02-12	D13
301	dairy	milk drink	2020-02-12	D13
302	dairy	milk drink	2020-02-12	D2
303	dairy	milk drink	2020-02-12	D1
304	dairy	milk drink	2020-02-12	D13
