# Supplementary material for: Listeria monocytogenes in ready to eat meat products from Zambia: phenotypical and genomic characterization of isolates
Source: Frontiers journal article supplement (doi:10.3389/fmicb.2023.1228726), 2023-08-30
Supplement: Data_Sheet_1.zip [file Supplementary Table 2.XLSX]

## Sheet: Table_S2
	MIC breakpoints (µg/ml)
Antimicrobials	S (≤value)	R (>value)
AUGa	4	8
AMP	1	1
A/Sa	4	8
FACb	0.001	0.5
FEPb	1	2
FIXb	0.5	1
AXOb	0.5	0.5
FURb	0.5	1
CHLb	8	8
CLAb	0.25	0.5
ERY	1	1
IMIb	2	2
LEVOa	4	4
MERO	0.25	0.25
PEN	1	1
SPAa	4	4
TETb	1	2
SXT	0.06	0.06
aMIC values for Enterococcus spp; bMIC values for Streptococcus pneumoniae
amoxicillin/ clavulanic acid (AUG), ampicillin (AMP), ampicillin/ sulbactam (A/S), cefaclor (FAC), cefepime (FEP), cefixime (FIX), ceftriaxone (AXO), cefuroxime sodium (FUR), chloramphenicol (CHL), clarithromycin (CLA), erythromycin (ERY), imipenem (IMI), levofloxacin (LEVO), meropenem (MERO), penicillin (PEN), sparfloxacin (SPA), tetracycline (TET) and trimethoprim/ sulfamethoxazole (SXT).
