# Supplementary material for: Listeria monocytogenes in ready to eat meat products from Zambia: phenotypical and genomic characterization of isolates
Source: Frontiers journal article supplement (doi:10.3389/fmicb.2023.1228726), 2023-08-30
Supplement: Data_Sheet_1.zip [file Supplementary Table 3.XLSX]

## Sheet: Table_S3
Antimicrobials	MIC range (µg/ml)
AUG*	2-16
AMP	0,12-4
A/ S*	1-2
FAC	4-16
FEP	0.12-2
FIX	0.12-1
AXO	0.03-2
FUR	0.5-8
CHL	0.5-4
CLA	0.12-16
ERY	0.25-0.5
IMI	0.5-4
LEVO	0.03-4
MERO	0.06-2
PEN	0.03-1
SPA	0.03-1
TET	0.25-4
SXT**	0.06-0.06
*AUG and A/S are in the ratio 2:1. Breakpoints are expressed as the ampicillin concentration. **SXT is in the ratio 1:19. Breakpoints are expressed as the trimethoprim concentration
amoxicillin/ clavulanic acid (AUG), ampicillin (AMP), ampicillin/ sulbactam (A/S), cefaclor (FAC), cefepime (FEP), cefixime (FIX), ceftriaxone (AXO), cefuroxime sodium (FUR), chloramphenicol (CHL), clarithromycin (CLA), erythromycin (ERY), imipenem (IMI), levofloxacin (LEVO), meropenem (MERO), penicillin (PEN), sparfloxacin (SPA), tetracycline (TET) and trimethoprim/ sulfamethoxazole (SXT).
