# Supplementary material for: Listeria monocytogenes in ready to eat meat products from Zambia: phenotypical and genomic characterization of isolates
Source: Frontiers journal article supplement (doi:10.3389/fmicb.2023.1228726), 2023-08-30
Supplement: Data_Sheet_1.zip [file Supplementary Table 4.XLSX]

## Sheet: Table_S4
Strain Identification	A/S	AMP	AUG	AXO	CLA	SXT	ERY	FAC	FEP	FIX	FUR	IMI	LEVO	MERO	PEN	TET
2021.TE.2	<2/1	0.25	<2/1	>2	<0.12	<0.06	<0.25	>16	>2	>1	>8	<0.5	1	0.12	0.25	1
2021.TE.3	<2/1	0.25	<2/1	>2	<0.12	<0.06	<0.25	>16	>2	>1	>8	<0.5	1	0.12	0.25	1
2021.TE.4	<2/1	0.25	<2/1	>2	0.25	<0.06	<0.25	16	>2	>1	>8	<0.5	1	0.12	0.25	1
2021.TE.5	<2/1	0.5	<2/1	>2	0.25	<0.06	<0.25	16	>2	>1	>8	<0.5	1	0.12	0.5	1
2021.TE.6	<2/1	0.25	<2/1	>2	0.25	<0.06	<0.25	16	>2	>1	>8	<0.5	1	0.12	0.5	1
2021.TE.7	<2/1	0.25	<2/1	>2	<0.12	<0.06	<0.25	16	>2	>1	>8	<0.5	1	<0.06	0.25	1
2021.TE.8	<2/1	0.25	<2/1	>2	0.25	<0.06	<0.25	16	>2	>1	>8	<0.5	1	0.12	0.25	1
2021.TE.9	<2/1	0.5	<2/1	>2	0.25	<0.06	<0.25	16	>2	>1	>8	<0.5	1	0.12	0.5	1
2021.TE.10	<2/1	0.5	<2/1	>2	<0.12	<0.06	<0.25	16	>2	>1	>8	<0.5	0.5	0.25	1	1
2021.TE.11	<2/1	0.25	<2/1	>2	<0.12	0.12	<0.25	16	>2	>1	>8	<0.5	1	0.12	0.5	1
2021.TE.12	<2/1	0.25	<2/1	>2	<0.12	<0.06	<0.25	16	>2	>1	>8	<0.5	0.5	0.12	0.25	1
2021.TE.13	<2/1	0.25	<2/1	>2	<0.12	<0.06	<0.25	16	>2	>1	>8	<0.5	0.5	0.12	0.5	1
2021.TE.14	<2/1	0.25	<2/1	>2	<0.12	<0.06	<0.25	16	>2	>1	>8	<0.5	1	0.12	0.25	4
2021.TE.15	<2/1	0.25	<2/1	>2	0.25	<0.06	<0.25	16	>2	>1	>8	<0.5	0.5	<0.06	0.25	1
2021.TE.16	<2/1	2	<2/1	>2	<0.12	<0.06	<0.25	16	>2	>1	>8	<0.5	1	0.12	0.25	4
2021.TE.17	<2/1	0.25	<2/1	>2	<0.12	<0.06	<0.25	16	>2	>1	>8	<0.5	0.5	<0.06	0.25	1
2021.TE.18	<2/1	0.5	<2/1	>2	<0.12	<0.06	<0.25	16	>2	>1	>8	<0.5	1	0.12	0.5	1
2021.TE.19	<2/1	0.25	<2/1	>2	<0.12	<0.06	<0.25	16	>2	>1	>8	<0.5	2	0.12	0.25	1
amoxicillin/ clavulanic acid (AUG), ampicillin (AMP), ampicillin/ sulbactam (A/S), cefaclor (FAC), cefepime (FEP), cefixime (FIX), ceftriaxone (AXO), cefuroxime sodium (FUR), chloramphenicol (CHL), clarithromycin (CLA), erythromycin (ERY), imipenem (IMI), levofloxacin (LEVO), meropenem (MERO), penicillin (PEN), sparfloxacin (SPA), tetracycline (TET) and trimethoprim/ sulfamethoxazole (SXT).
